1 H2A ubiquitination is essential for Polycomb Repressive Complex 1-mediated gene regulation in  
2 *Marchantia polymorpha*

3 Shujing Liu<sup>1</sup>, Minerva S. Trejo-Arellano<sup>1,2</sup>, Yichun Qiu<sup>1</sup>, D. Magnus Eklund<sup>3</sup>, Claudia Köhler<sup>1</sup>, Lars  
4 Hennig<sup>1,4</sup>

5 <sup>1</sup>Department of Plant Biology, Swedish University of Agricultural Sciences and Linnean Center for Plant  
6 Biology, Uppsala 75007, Sweden.

7 <sup>2</sup>Present address: Department of Cell and Developmental Biology, John Innes Centre, Norwich NR4 7UH,  
8 UK

9 <sup>3</sup>Department of Plant Ecology and Evolution, Evolutionary Biology Centre, Uppsala University, Uppsala  
10 75236, Sweden

11 <sup>4</sup>Deceased

12

13 Correspondence: [Claudia.Kohler@slu.se](mailto:Claudia.Kohler@slu.se)

14

15

16

17

18

19

20 **Abstract**

21 Polycomb repressive complex 1 (PRC1) and PRC2 are chromatin regulators maintaining transcriptional  
22 repression. The deposition of H3 lysine 27 tri-methylation (H3K27me3) by PRC2 is known to be required  
23 for transcriptional repression, whereas the contribution of H2A ubiquitination (H2Aub) in the Polycomb  
24 repressive system remains unclear in plants. We directly tested the requirement of H2Aub for gene  
25 regulation in *Marchantia polymorpha* by generating point mutations in H2A that prevent ubiquitination  
26 by PRC1. These mutants show reduced H3K27me3 levels on the same target sites as mutants defective in  
27 PRC1 subunits MpBMI1 and the homolog MpBMI1L, revealing that PRC1-catalyzed H2Aub is essential  
28 for Polycomb system function. Furthermore, by comparing transcriptome data between mutants in  
29 *MpH2A* and *MpBMI1/L*, we demonstrate that H2Aub contributes to the PRC1-mediated transcriptional  
30 level of genes and transposable elements. Together, our data demonstrate that H2Aub plays a direct role  
31 in H3K27me3 deposition and is required for PRC1-mediated transcriptional changes in both genic and  
32 intergenic regions in *Marchantia*.

33

34

35

36

37

38

39

40

41

## 42 **Background**

43 Polycomb group (PcG) proteins are evolutionarily conserved epigenetic regulators which maintain  
44 transcriptional gene repression in essential cellular and developmental processes in eukaryotes [1–4]. PcG  
45 proteins typically belong to one of the two functionally distinct multi-protein complexes: Polycomb  
46 Repressive Complex 1 (PRC1) and PRC2. PRC1 promotes chromatin compaction and catalyzes mono-  
47 ubiquitination on histone 2A (H2Aub) mainly at lysine 119 in mammals, lysine 118 in *Drosophila*, and  
48 lysine 121 in *Arabidopsis* [4–8], whereas PRC2 tri-methylates histone 3 at lysine 27 (H3K27me3) [9–12].  
49 The catalytic core of the mammalian PRC1 is composed of the E3 ubiquitin ligases RING1A or RING1B  
50 and one of six Polycomb RING finger (PCGF) proteins [13–15], while in *Drosophila* it consists of  
51 RING1 (encoded by the *Sce* gene) and one of two PCGF proteins: Psc or Su(z)2 [16–18]. The  
52 *Arabidopsis* PRC1 core includes AtRING1A or AtRING1B and one of the three AtBMI1s (homologs of  
53 PCGF4) [6,19–21].

54 Previous studies on the Polycomb repressive system in *Drosophila* and mammals first proposed a PRC2-  
55 initiated hierarchical model where PRC2 establishes H3K27me3, which is then recognized by  
56 chromodomain-containing subunits of the canonical PRC1 (cPRC1). Nevertheless, later studies found this  
57 classical hierarchical model not sufficient to explain the Polycomb repressive system [13,22,23]. Instead,  
58 it was found that non-canonical PRC1 (ncPRC1) lacking chromodomain-containing subunits can recruit  
59 PRC2 and establish stable Polycomb repressive domains [24–27]. This data point that the PRC1 catalytic  
60 function is required for PRC2 recruitment, which was supported by recent work showing that in mouse  
61 embryonic stem cells (ESCs), loss of RING1B catalytic activity largely phenocopies the complete  
62 removal of the RING1B protein [28,29]. Nevertheless, whether this is a generally applicable concept  
63 remains to be established. In *Drosophila*, H2AK118ub seems not required for repression of Polycomb  
64 target genes during the early stages of embryo development and PRC2 binding to chromatin requires  
65 PRC1 but not H2Aub [30,31]. Similarly, during neuronal fate restriction in mouse, PRC1 repression was

66 shown to function independently of ubiquitination of [32]. This data suggest that there are developmental  
67 context-specific differences in the functional requirement of the catalytic activity of PRC1.

68 PRC1-catalyzed H2Aub has been intensively studied in *Arabidopsis thaliana*. H2Aub level, H3K27me3  
69 incorporation and chromatin accessibility were shown to be affected by the depletion of components of  
70 PRC1 [33–35]. Nevertheless, it remains unclear thus far whether H2Aub is required for H3K27me3  
71 targeting. PRC1 is composed of multiple proteins that engage in interactions with PRC2 components.  
72 Thus, AtRING and AtBMI1 in PRC1 can interact with LHP1, which co-purifies with PRC2 [19,20,36],  
73 suggesting that PRC1 rather than H2Aub promotes H3K27me3 by interacting and recruiting PRC2 to  
74 chromatin. H2Aub is associated with permissively accessible chromatin and the average transcription  
75 levels of only-H2Aub marked genes are higher than that of H2Aub/H3K27me3 and only-H3K27me3  
76 marked genes in *Arabidopsis* [33,35]. Consistently, removal of H2Aub is required for stable repression of  
77 Polycomb target genes [34]. Together, based on current studies, the direct role of H2Aub in  
78 transcriptional regulation remains unclear. To explore the functional role of H2Aub, we generated H2Aub  
79 mutants by replacing the endogenous H2A by H2A variants with mutated lysines in the liverwort  
80 *Marchantia polymorpha*.

81 *Marchantia* shares many signaling pathways with *Arabidopsis* and other seed plants [37]. Together with  
82 its low genetic redundancy and possibilities to easily generate mutants, *Marchantia* is an ideal plant  
83 model to study the evolutionarily conserved Polycomb system. There is only a single gene encoding  
84 canonical H2A in *Marchantia*, compared to four genes in *Arabidopsis* [38]. We generated lysine to  
85 arginine substitutions in H2A on residues K115/116/119 and demonstrate that all three lysines are  
86 ubiquitinated *in vivo* and likely have redundant functions. We furthermore show that H2Aub mediates  
87 H3K27me3 incorporation in both genic and intergenic regions in *Marchantia* and reveal that H2Aub is  
88 essential for both, PRC1-mediated transcriptional activation and silencing.

89

## 90 Results

### 91 H2Aub mediates H3K27me3 deposition on Polycomb target sites in genic and intergenic regions

92 In mutants of PRC1 components, decreased H2Aub correlates with reduced H3K27me3 [33,35]. To  
93 elucidate the functional requirement of H2Aub to induce H3K27me3 incorporation, we generated H2Aub  
94 depleted lines by introducing point mutations in the potential ubiquitination sites of canonical M<sub>p</sub>H2A  
95 (Fig. S1a). We co-transformed the point mutated *H2A* variants and a CRISPR construct designed to knock  
96 out the endogenous *H2A* (Fig. S1b, S1c). Lysine 120 (K120) and K121 of *Arabidopsis* H2A were shown  
97 to be ubiquitinated by AtBMI1 *in vitro* [6,20]; corresponding to K115 and K116 in M<sub>p</sub>H2A (Fig. 1a). In  
98 *Drosophila*, mutations of four close lysine sites (K117, K118, K121 and K122) are required to abolish  
99 total H2Aub [30]. We therefore generated *Mph2a;H2AK115R/K116R* and *Mph2a;H2AK119R* mutants  
100 (jointly referred to as *h2a\_ub* mutants) by substituting the C-terminal lysine residues K115 and K116 or  
101 K119 of M<sub>p</sub>H2A with arginine. We failed to obtain *Mph2a* mutants expressing *H2A* variants with all  
102 three point mutations, indicating that the three lysine sites of M<sub>p</sub>H2A are functionally redundant. The  
103 global H2Aub level was strongly decreased in lines of *Mph2a;H2AK115R/K116R* and *Mph2a;H2AK119R*  
104 mutants compared to wild type (WT) (Fig. 1b). Nevertheless, there was a remaining H2Aub signal in both  
105 mutant lines, indicating that all lysine residues can be ubiquitinated *in vivo* and likely act redundantly.  
106 The most obvious defects of *h2a\_ub* mutants were downward curled edges of the thallus that grew into  
107 the growth media and decreased gemmae dormancy compared to WT (Fig. 1c-1h).

108 To understand the connection between H2Aub and H3K27me3 in the Polycomb repressive system, we  
109 generated ChIP-seq data for H3, H2Aub and H3K27me3 in WT, *Mph2a;H2AK115R/K116R* #1 and  
110 *Mph2a;H2AK119R* #1 mutants. To validate our ChIP-seq data, we compared the H3K27me3 peaks in our  
111 WT with previously published data [39]. The majority of peaks overlapped between both datasets (Fig.  
112 S2), supporting the quality of our data. We found that genes with decreased H2Aub in the  
113 *Mph2a;H2AK115R/K116R* mutant had also decreased H2Aub levels in the *Mph2a;H2AK119R* mutant,

114 but to a lesser extent (Fig. 1i). Conversely, genes with reduced H2Aub level in the *Mph2a;H2AK119R*  
115 mutant were less affected in the *Mph2a;H2AK115R/K116R* mutant (Fig. 1j), supporting the notion that all  
116 three lysine residues of MpH2A are targeted by ubiquitination. To test whether H3K27me3 deposition is  
117 affected upon H2Aub depletion, we analyzed H3K27me3 on genes marked by either H2Aub or  
118 H3K27me3 (all marked genes, all genes in Fig. 1k) and genes marked by both H2Aub and H3K27me3  
119 (H2Aub/H3K27me3, overlapped genes in Fig. 1k). We found H3K27me3 levels to be decreased on all  
120 marked genes and a more pronounced decrease on H2Aub/H3K27me3 genes in both *h2a\_ub* mutants  
121 compared to WT (Fig. 1l, 1m), revealing that H2Aub is essential for H3K27me3 deposition.

122 In *Marchantia*, 60% of H3K27me3 peaks are present in intergenic regions [39]; however, the location of  
123 H2Aub peaks remains to be explored. Out of 6575 H2Aub peaks identified in WT, about 20% mapped to  
124 intergenic regions, while most of the H2Aub peaks were located in gene body or promoter regions (Fig.  
125 S3). We found intergenic regions covered by H2Aub and H3K27me3 also had decreased H3K27me3  
126 levels in both *h2a\_ub* mutants (Fig. 1n), revealing that H2Aub is required in intergenic regions to recruit  
127 H3K27me3 in plants.

128

## 129 **H2Aub contributes to transcriptional activation**

130 Although many transcriptionally active genes are marked with H2Aub and H2Aub is associated with a  
131 permissive chromatin state in *Arabidopsis* [33–35], it is unknown whether H2Aub is required for gene  
132 activation. We noted that in *h2a\_ub* mutants there were more downregulated than upregulated genes (Fig.  
133 2a, 2b), suggesting that H2Aub has an activating role for gene expression in *Marchantia*. Both  
134 upregulated and downregulated genes in *h2a\_ub* mutants were enriched for genes with only-H2Aub and  
135 H2Aub/H3K27me3 (Fig. 2c). We tested the H2Aub level on upregulated and downregulated genes in  
136 *h2a\_ub* mutants and found that H2Aub levels were decreased in the promoter regions of both gene

137 categories (Fig. 2d-2g), supporting that H2Aub contributes to gene repression as well as activation. We  
138 also found more downregulated than upregulated TEs in *h2a\_ub* mutants (Fig. 2h, 2i). There were 559  
139 TEs marked with only-H2Aub, 1059 with H2Aub/H3K27me3 and 5728 with only-H3K27me3 (Fig. S4).  
140 Among those, the only-H2Aub and H2Aub/H3K27me3 marked TEs had a significantly higher number of  
141 highly transcriptionally active TEs than the only-H3K27me3 marked TEs (Fig. 2j), pointing that H2Aub  
142 has the potential to activate TE expression and that removal of H2Aub is required for stable repression.

143

144 **MpBMI1/1L regulate morphological development of *Marchantia* and are involved in gene**  
145 **repression and activation**

146 In *Arabidopsis*, AtBMI1s have been shown to be involved in H2A ubiquitination [6,20,21,33]. To explore  
147 the extent to which MpBMI1/1L function relies on H2Aub, we generated MpBMI1 knock out mutants by  
148 CRISPR/Cas9 in *Marchantia*. Using the AtBMI1A protein sequence as a query in a protein blast, we  
149 identified two genes (*Mp7g12670* and *Mp6g09730* in the MpTak1 v5.1 annotation) encoding AtBMI1  
150 homologs in *Marchantia*. MpBMI1, encoded by *Mp7g12670*, contains an N-terminal RING finger  
151 domain and a C-terminal ubiquitin-like (RAWUL) domain [40], while *Mp6g09730* encodes for a protein  
152 named MpBMI1-LIKE (MpBMI1L) that only has a C-terminal RAWUL domain. The RAWUL domain  
153 is involved in protein-protein interaction and oligomerization of BMI1, which is essential for H2Aub  
154 activity of PRC1 in mammals [41–44]. We generated *Mpbmi1/1l* double knockout mutants by  
155 CRISPR/Cas9 and obtained combinations of double mutants with different mutations at the Cas9 target  
156 sites (mutant information shown in Fig. S5, S6). Combinations of strong mutant alleles for both genes  
157 *Mpbmi1-1/Mpbm1l-1* (named *Mpbmi1/1l*#1, Fig. S5a) and *Mpbmi1-2/Mpbm1l-2* (named *Mpbmi1/1l* #2,  
158 Fig. S5b) caused strongly reduced growth rates and substantial size-reduction of gemma cups that  
159 contained only few and smaller gemmae compared to WT (Fig. 3a-3c and 3f-3h). The slightly more  
160 severe size reduction in *Mpbmi1/1l* #1 compared to *Mpbmi1/1l* #2 is likely due to the different extent of

161 deletions and insertions caused by CRISPR/Cas9 in these two lines (Fig. S5). We also obtained one  
162 double mutant with a strong *Mpbmi1-3* allele and a weak *Mpbmi11-3* allele (named *Mpbmi1/11* #3, Fig.  
163 S6a) and one *Mpbmi11-4* single mutant (Fig. S6b), which showed weakly reduced growth rates compared  
164 to WT (Fig. 3d, 3e). The fact that *Mpbmi1/11* mutants had a more severe phenotype than *h2a\_ub* mutants  
165 is consistent with the proposed redundant function of ubiquitination on K115/K116 and K119 in H2A.  
166 Western blot analysis revealed a global decrease of H2Aub in *Mpbmi1/11* #1, *Mpbmi1/11* #2 and  
167 *Mpbmi1/11* #3 double mutants compared to WT (Fig. 3i), with a more pronounced reduction in the  
168 *Mpbmi1/11* #1 mutant combination. We therefore used *Mpbmi1/11* #1 in subsequent analyses. The residual  
169 H2Aub signal in the *Mpbmi1/11* mutants possibly reflects remaining functional activity of MpBMI1/1L  
170 generated in the mutants. Alternatively, MpRING proteins have low functional activity in the absence of  
171 MpBMI1/1L. We found 2085 genes being upregulated and 1023 genes being downregulated in the  
172 *Mpbmi1/11* mutants (Fig. 3j), suggesting that MpBMI1/1L mainly function as repressors, but also possibly  
173 as activators. We analyzed H2Aub levels on the deregulated genes in the *Mpbmi1/11* mutants and found  
174 that H2Aub level significantly decreased on both upregulated genes and downregulated genes (Fig. 3k),  
175 implying that H2Aub is required for MpBMI1/1L-mediated gene silencing and activation. Accordingly,  
176 H2Aub marked genes were enriched in both upregulated and downregulated genes in *Mpbmi1/11* mutants  
177 (Fig. 3l).

178

### 179 **Ubiquitination of H2AK115/K116 and H2AK119 is required for PRC1-mediated gene and** 180 **transposable element expression**

181 To test whether impaired H2A ubiquitination and loss of PRC1 function has similar consequences, we  
182 compared transcriptome data of the *Mph2a;H2AK115R/K116R* and *Mph2a;H2AK119R* mutants with that  
183 of the *Mpbmi1/11* mutants. Both *h2a\_ub* mutants shared a significant number of upregulated genes (Fig.  
184 4a) and we also found a significant overlap of upregulated genes between the *Mpbmi1/11* mutants and



185 *h2a\_ub* mutants (Fig. 4b, 4c) as well as between all mutants (Fig. 4d). Similarly, a significant number of  
186 downregulated genes overlapped between two *h2a\_ub* mutants and *Mpbmi1/1l* mutants (Fig. 4e-4h).  
187 Genes commonly upregulated in *Mpbmi1/1l* and *Mph2a;H2AK115R/K116R* or *Mph2a;H2AK119R*  
188 mutants were more strongly upregulated in *Mpbmi1/1l* than in the *h2a\_ub* mutants (Fig. 4i, 4j),  
189 supporting the idea that mono-ubiquitination on H2AK115/K116 and H2AK119 is functionally redundant  
190 and mediated by MpBMI1/1L. Commonly downregulated genes in *h2a\_ub* and *Mpbmi1/1l* mutants were  
191 expressed at similar low levels in *h2a\_ub* and *Mpbmi1/1l* mutants (Fig. 4k, 4l), consistent with the idea  
192 that H2Aub is required for PRC1-mediated gene activation. Furthermore, it suggests that ubiquitination of  
193 H2AK115/K116 and H2AK119 is not functionally redundant in activating gene expression. GO  
194 enrichment analyses of upregulated genes overlapping between *Mpbmi1/1l* and  
195 *Mph2a;H2AK115R/K116R* mutants (Fig. 4m) or *Mpbmi1/1l* and *Mph2a;H2AK119R* mutants (Fig. 4n)  
196 both showed that response pathways were over-represented. Among downregulated genes overlapped  
197 between *Mpbmi1/1l* and *h2a\_ub* mutants we also found a significant enrichment for response pathway  
198 related GOs (Fig. 5a, 5b), which were nevertheless largely distinct from the enriched GO terms of  
199 upregulated genes.

200 The localization of H2Aub in intergenic regions indicated a role of this modification for transposable  
201 element (TE) repression. Indeed, we identified more than 900 upregulated TEs in *Mpbmi1/1l* mutants, of  
202 which a significant number overlapped with upregulated TEs in *h2a\_ub* mutants (Fig. 5c-5e), revealing  
203 that H2Aub is critical for PRC1-mediated TE silencing. Like for genes, commonly upregulated TEs  
204 between *Mpbmi1/1l* mutants and *h2a\_ub* mutants were more strongly upregulated in *Mpbmi1/1l* mutants  
205 compared to *h2a\_ub* mutants (Fig. 5f, 5g), pointing at redundant regulation of TEs by mono-  
206 ubiquitination of H2AK115/K116 and H2AK119.

207

208 **H2Aub and H3K27me3 are affected in genic and intergenic regions by the depletion of MpBMI1/1L**

209 Consistent with the effect caused by AtBMI1 depletion in *Arabidopsis* [33], the H2Aub level was  
210 significantly decreased on all marked genes as well as H2Aub/H3K27me3 genes in the *Mpbmi1/1l*  
211 mutants compared to WT (Fig. 6a, 6b and S7a). Also the H3K27me3 level was significantly decreased on  
212 all marked genes and H2Aub/H3K27me3 genes, yet not on only H3K27me3 genes in the *Mpbmi1/1l*  
213 mutants compared to WT (Fig. 6c, 6d and S7b), implying that PRC1 activity mediates H3K27me3  
214 deposition in *Marchantia*. Consistently, genes losing H2Aub showed significantly reduced H3K27me3  
215 levels in the *Mpbmi1/1l* mutants compared to WT (Fig. 6e). We tested whether genes losing H2Aub in the  
216 *Mpbmi1/1l* mutants belong to specific pathways. Among the top twenty significantly enriched GO terms,  
217 nine GO terms correspond to multiple response pathways to intrinsic and extrinsic stimuli (Fig. 6f), which  
218 occurred in the commonly upregulated and downregulated genes between *Mpbmi1/1l* mutants and *h2a\_ub*  
219 mutants. We tested whether the connection between H2Aub and H3K27me3 was restricted to genic  
220 regions or was also present in intergenic regions. Loss of MpBMI1/1L caused a significant decrease of  
221 both, H2Aub and H3K27me3 levels in intergenic regions (Fig. 6g-6i), revealing that PRC1-mediated  
222 recruitment of PRC2 is not restricted to genic regions.

223

## 224 Discussion

225 Understanding the extent to which the function of histone modifying enzymes requires their catalytic  
226 activity is an ongoing challenge in the chromatin field. While recent work revealed that the catalytic  
227 activity of PRC1 is required in mouse ESCs [28,29], whether this requirement is evolutionary conserved,  
228 remains to be demonstrated. We found that PRC1-catalyzed H2Aub contributes to the Polycomb-  
229 mediated transcriptional repression in *Marchantia*, similar to the reported requirements in mouse ESCs  
230 [28,29]. Our study thus supports an evolutionarily conserved Polycomb mechanism in plants and animals.  
231 Loss of MpBMI1/1L activity in *Marchantia* impaired the genome-wide deposition of H3K27me3, similar  
232 to reported findings in *Arabidopsis* [33]. Nevertheless, it was previously unknown whether the reduction

233 of H3K27me3 in *Atbmi1* is a consequence of decreased PRC1 catalytic activity or PRC1 non-catalytic  
234 activity, since PRC1 and PRC2 were shown to interact [19,20,36]. By comparing the H2Aub deficient  
235 mutants *Mph2a;H2AK115R/K116R* and *Mph2a;H2AK119R* with *Mpbmi1/1l* mutants, we discovered that  
236 reduction of H3K27me3 levels on Polycomb target genes in *Mpbmi1/1l* mutants also occurred in *h2a\_ub*  
237 mutants that evade ubiquitination, demonstrating that H2Aub directly affects H3K27me3 deposition.  
238 Previous work showed that PRC1 initiates silencing, followed by PRC2-mediated H3K27me3 that  
239 maintains stable repression in *Arabidopsis* [6,21,33,34]. Our data add support to this model and extend it  
240 by showing that the PRC1-mediated H2Aub is required for the initial PRC2-mediated repression.

241 In *Marchantia*, H3K27me3 is located in heterochromatic regions and marks TEs and repeats [39],  
242 contrasting its mainly genic localization in *Arabidopsis* [33]. We show that PRC1-catalyzed H2Aub is  
243 required for TE repression in *Marchantia*, revealing an ancestral role of the Polycomb system in TE  
244 repression. Similarly, in *Drosophila*, H2AK118sub is widely distributed in intergenic regions and  
245 depletion of PRC1 or PRC2 causes a genome-wide increase of transcriptional activity in intergenic  
246 regions [45].

247 The failure to obtain *Mph2a;H2AK115R/K116R/K119R* mutants with complete loss of H2Aub strongly  
248 suggests that H2Aub has essential functions in *Marchantia*. Similarly, H2Aub deficient *Drosophila*  
249 embryos arrest at the end of embryogenesis, indicating that the requirement of H2Aub to regulate  
250 essential biological functions is evolutionary conserved [30]. As for H2Aub deficiency, also loss of the  
251 RING1 encoding gene *Sce* causes arrest of embryo development in *Drosophila* [30]. In contrast, we found  
252 that mutants in *MpBMI1/1L* are viable and similarly, also mutants in *Arabidopsis* BMI encoding genes are  
253 viable [21]. Nevertheless, it is possible that in both systems BMI function is not completely depleted,  
254 since the *Atbmi1b* and *Atbmi1c* mutant alleles are probably not complete null alleles [6,20] and we found  
255 remaining H2Aub present in *Mpbmi1/l* mutants (Fig. 1g), pointing that the alleles have residual activity.  
256 We failed to obtain CRISPR/Cas9 mutants using guide RNAs targeting an N-terminal region in the  
257 MpBMI1, suggesting that complete loss of PRC1 function is lethal. Nevertheless, it is also possible that

258 RING proteins can have catalytic activity independent of BMI proteins, as suggested based on *in vitro*  
259 catalytic activity of AtRING1A and AtRING1B proteins (Bratzel et al., 2010). Previous work revealed  
260 that the H2A variant H2A.Z can be ubiquitinated in *Arabidopsis* and incorporation of this modification is  
261 required for H2A.Z-mediated transcriptional repression [46]. It is possible that MpBMI1/1L also affects  
262 ubiquitination of the H2A variant H2A.Z; which could provide an alternative explanation for the more  
263 severe phenotype of *Mpbmi1/1l* mutants compared to *h2a\_ub*. Due to the lack of a suitable antibody, this  
264 possibility could not be tested.

265 Previous work revealed that PRC1-mediated H2Aub1 is associated with chromatin responsiveness in  
266 *Arabidopsis* and that responsive genes require H2Aub to initiate PRC2 mediated repression [34,35]. At  
267 the same time, for stable gene repression H2Aub needs to be removed by the H2A deubiquitinases  
268 UBP12 and UBP13, likely because the occurrence of H2Aub allows recruitment of the H3K27me3  
269 demethylase REF6 (Kralemann et al., 2020). The association of H2Aub with gene activation is also  
270 supported by our study, where we found more downregulated genes than upregulated genes in the *h2a\_ub*  
271 mutants and a high number of downregulated genes in *Mpbmi1/1l* mutants. A significant number of  
272 downregulated genes overlapped between the mutants, suggesting that the catalytic activity of PRC1 is  
273 required for gene activation. How PRC1 activity connects to gene activation remains unclear, despite  
274 several studies reporting the co-occurrence of ncPRC1 and active genes in mammalian systems [47–50].  
275 It was proposed that the PRC1-catalytic activity may be dispensable for PRC1 function in promoting the  
276 expression of active genes in mammalian systems [51]; however, our data rather suggest that PRC1-  
277 catalyzed H2Aub is required for gene activation. We speculate that the role of H2Aub in gene activation  
278 is connected to its proposed role in recruiting REF6 [34], an exciting hypothesis that remains to be tested.

279

## 280 **Conclusions**

281 In summary, we show that the ubiquitinated lysines in MpH2A act redundantly and H2Aub directly  
282 contributes to the deposition of H3K27me3 in *Marchantia*, demonstrating the determinant role of PRC1  
283 catalysis in the Polycomb repressive system. Together with previous findings in *Arabidopsis* and mouse  
284 ESCs [28,29,33], our study supports an evolutionarily conserved Polycomb mechanism in divergent land  
285 plants and animals. Our finding strongly support a model in which the catalytic activity of PRC1 is  
286 required for PRC2-mediated gene repression and at the same time required for PRC2-independent gene  
287 activation.

288

## 289 **Methods**

### 290 *Plant material and growth conditions*

291 *Marchantia polymorpha* ssp. *ruderalis* Uppsala accession (Upp) was used as WT and for transformation  
292 [52]. Plants were grown on vented petri dishes containing Gamborg's B5 medium solidified with 1.4%  
293 plant agar, pH 5.5, under 16/8 h photoperiod at 22°C with a light intensity of 60-70  $\mu\text{mol m}^{-2} \text{s}^{-1}$ . Plate  
294 lids were taped to prevent loss of water.

295

### 296 *Generation of DNA constructs*

297 Vectors pMpGE\_En03, pMpGE010, pMpGWB401 and pMpGWB403 used in this study were previously  
298 described [53,54]. DNA fragments used to generate the guide RNAs against *MpBMI1* and *MpBM1L*  
299 were prepared by annealing two pairs of primers (LH4513/LH4514, LH4517/LH4518, specified in table  
300 S1). The fragments were inserted into the BsaI site of pMpGE\_En03 to yield pMpGE\_En03-  
301 MpBMI1gRNA02 and pMpGE\_En03-MpBM1LgRNA04, respectively, and then transferred into  
302 pMpGE010 and pMpGWB401 using the Gateway LR reaction (Thermo Fisher Scientific) to generate

303 pMpGE010\_MpBMI1gRNA and pMpGWB401\_MpBMI1LgRNA. Similarly, the two pairs of primers  
304 (LH4012/LH4013, LH4303/LH4304) were used to generate pMpGE\_En03-MpH2AgRNA2 and  
305 pMpGE\_En03-MpH2AgRNA3, which were subsequently transferred into pMpGE010 to generate  
306 pMpGE010-MpH2AgRNA2 and pMpGE010-MpH2AgRNA3, respectively. H2AK115R/K116R and  
307 H2AK119R were amplified by two pairs of primers (LH3848/LH4309 and LH3848/LH3849) and sub-  
308 cloned into the pENTR-TOPO vector (Thermo Fisher Scientific) to generate pENTR-H2AK115R/K116R  
309 and pENTR-H2AK119R, respectively. The pENTR vectors were transferred into pMpGWB403 by  
310 Gateway LR reaction to yield pMpGWB403-H2AK115R/K115R and pMpGWB403-H2AK119R.  
311 Primers used are listed in supplemental table S1.

312

### 313 *Generation of transgenic Marchantia polymorpha*

314 The constructs were transformed into spores of *Marchantia* by *Agrobacterium* GV3101 as described  
315 previously [55]. Spores were grown in liquid Gamborg's B5 medium with 2% sucrose, 0.1% Casamino  
316 acids and 0.03% L-Glutamine for 10 days under constant light. *Agrobacteria* containing constructs were  
317 grown in liquid LB with antibiotic for two days and then pelleted. The pellet was resuspended in the spore  
318 growth media with 100 mM acetosyringone and grown for 4 h at 28°C with spinning. *Agrobacteria*  
319 suspension was added to spores together with acetosyringone to a final concentration of 100 mM and the  
320 mixture was grown for another two days. Sporelings were plated on selection media with 200 mg/ml  
321 Timentin. Several independent primary transformants (T1 generation) were analyzed for the presence of  
322 the transgene by genomic PCR.

323

### 324 *Antibodies*

325 The antibodies used were anti-H3 (07-690, Merck Millipore, Burlington, MA, USA), anti-H2Aub  
326 (#8240S, Cell signalling technology, Danvers, MA) and anti-H3K27me3 (07-449, Merck Millipore).

327

### 328 *Histone extraction and western blotting*

329 Histone extraction and western blotting of 15d seedlings were performed as previously described [36].

330

### 331 *RNA sequencing*

332 50 mg of 15 day-old thalli of WT, *Mpbmi1/1l*, *Mph2a;H2AK115R/K116R* and *Mph2a;H2AK119R*  
333 mutants were used for RNA extraction. RNA was extracted using the MagMAX™ Plant RNA Isolation  
334 Kit (Thermo Fisher Scientific) in biological triplicates. Libraries were generated using DNA-free RNA  
335 with the NEBNext® Ultra™ II RNA Library Prep Kit for Illumina according to manufacturer's  
336 instructions. Sequencing was performed on an Illumina HiSeq2000 in 150-bp pair-end mode at Novogene  
337 (Hong Kong).

338

### 339 *Transcriptome data analysis*

340 Untrimmed reads were mapped to the *Marchantia polymorpha* MpTak1 v5.1 reference genome [39] using  
341 STAR (v2.5.3.a, [56]). Read numbers of mapping statistics are reported in supplementary table S2.  
342 Expression counts were generated using the R function summarizeOverlaps from the package HTSeq in  
343 union mode on exons from the reference transcriptome MpTak1v5.1\_r1. A comparison of RPKM in  
344 RNA-seq triplicates showed high reproducibility of data in Fig. S8. Differential expression analyses were

345 performed using the R package DESeq2 (v1.20.0, [57]). Genes with an absolute log<sub>2</sub> fold change  $\geq 1$  and  
346 FDR  $\leq 0.05$  were considered as differentially expressed.

347

### 348 *H3, H2Aub1 and H3K27me3 ChIP-seq*

349 For H3, H2Aub, and H3K27me3 ChIP-seq, WT, *Mpbmi1/1l*, *Mph2a;H2AK115R/K116R* and  
350 *Mph2a;H2AK119R* plants were grown for 15 days on B5 medium, and then about 300 mg thalli were  
351 harvested. ChIP was performed as described before [58]. In short, vacuum infiltration with formaldehyde  
352 was performed for 2x10 minutes. Crosslinking was quenched by adding glycine to a final concentration of  
353 0.125 M under another 5-minute vacuum infiltration. Sonication of the chromatin was done for eight 30-s  
354 ON, 30-s OFF cycles. Overnight antibody binding was performed directly after sonication, followed by  
355 adding washed protein A dynabeads (Thermo Fisher Scientific) to each ChIP aliquot. De-crosslinking and  
356 subsequent DNA recovery steps were performed using the Ipure kit v2 (Diagenode, Liège, Belgium). The  
357 Ovation Ultralow Sytem V2 (NuGEN, Redwood city, CA, USA) was used for the ChIP-seq library  
358 preparation, and 150 bp paired-end sequencing was performed on the HiseqX platform at Novogene  
359 (Hong Kong). The ChIP-seq experiments were done using two biological replicates per IP, per genotype.

360

### 361 *Quality control and read mapping for ChIP-seq*

362 FastQC (<https://www.bioinformatics.babraham.ac.uk/projects/fastqc/>) was used to examine read quality  
363 of each sample. Low quality ends (phred of  $<20$ ) and adapter sequences were removed with Trimmomatic  
364 (v0.39, [59]). Reads with low average quality were also discarded (phred  $< 28$ ). For all experiments, reads  
365 were mapped to the *M. polymorpha* reference genome MpTak1v5.1 using bowtie2 (v2.3.5.1; [60]).



366 Details on read numbers can be found in supplemental table S3. Genome sequence and gene annotation  
367 data were downloaded from the *Marchantia* website ([marchantia.info](http://marchantia.info)).

368

#### 369 *Peak calling*

370 H2Aub and H3K27me3 aligned .sam files were imported into Homer [61]. Duplicated mappings were  
371 removed using Homer. Peak calling was done using Homer with histone style settings and using histone  
372 H3 as the background to control for nucleosome occupancy. The same analysis was performed with the  
373 published WT H3K27me3 data (SRA: PRJNA553138) in *Marchantia* [39]. The peak tag counts were  
374 generated by Homer. A comparison of normalized peak tag counts (RPKM) by Homer in ChIP-seq  
375 replicates showed high reproducibility of data in Fig. S9. Only peaks present in both replicates of ChIP-  
376 seq data were considered as real peaks and retained for subsequent analyses. Peaks were correlated with a  
377 gene when the peaks were located at any region of this gene or at most 2 kb upstream of its transcription  
378 start site. Lists of genes defined by the presence of H2Aub and H3K27me3 are shown in supplemental  
379 table S4. Intergenic regions covered by H2Aub and H3K27me3 are listed in supplemental table S5. The  
380 statistical comparison of differential peak tag counts was performed with DEseq2 package in R using the  
381 raw tag counts outputs from Homer. Peaks with the adjusted p-value (FDR)  $< 0.05$  were considered as  
382 differentially changed peaks.

383

#### 384 *Peak visualization*

385 Peak profiles were visualized by the Integrative Genome Viewer (IGV) [62]. Bigwig files were outputted  
386 from “bamCoverage” function in deepTools [63] using Reads Per Kilobase Million (RPKM) as  
387 normalization parameter. The Bigwig files were further used in the “computMatrix” function in

388 deepTools with the “scale-regions” as setting parameter to generate H2Aub and H3K27me3 matrix on  
389 genes from 3 kb upstream of the transcriptional start to 3 kb downstream of the transcriptional end of  
390 genes, with a bin size of 50 bp. H2Aub and H3K27me3 scores (RPKM) of genes in boxplots were  
391 calculated as the average RPKM from 2 kb upstream of the transcriptional start to the transcriptional end  
392 of genes. H2Aub and H3K27me3 levels (RPKM) in intergenic region in boxplots were normalized tag  
393 counts about intergenic peaks generated from reads files (.sam file) during peak calling by Homer.

394

#### 395 *GO analysis*

396 GO analyses were performed on the *Arabidopsis* homologs of *Marchantia* genes. The homologs of  
397 *Marchantia* genes in *Arabidopsis* were retrieved from PLAZA 4.0 DICOT, inferred by the Best-Hits-and-  
398 Inparalogs (BHIF) approach ([64], [https://bioinformatics.psb.ugent.be/plaza/versions/plaza\\_v4\\_dicots/](https://bioinformatics.psb.ugent.be/plaza/versions/plaza_v4_dicots/),  
399 supplemental table S6). GO term enrichment was performed in PLAZA 4.0 DICOT.

400

#### 401 **Declarations**

#### 402 *Competing interests*

403 The authors declare no conflicts of interest.

404

#### 405 *Funding*

406 This work was funded by the Swedish Research Council VR (grant no. 2014-05822 to L.H.) and the  
407 Swedish Research Council Formas (grant no. 2016-00961 to L.H.) and a grant from the Knut and Alice  
408 Wallenberg foundation (grant no. 2012.0087 to L.H.).

409

#### 410 *Acknowledgements*

411 The computations of the RNA-seq data were performed on resources provided by SNIC through the  
412 Uppsala Multidisciplinary Center for Advanced Computational Science (UPPMAX) under Project SNIC  
413 2017/7-6. We would like to thank Frédéric Berger (GMI) for kindly providing *Marchantia* H2A  
414 antibodies.

415

#### 416 *Author contributions*

417 L.H., C.K. and S.L. conceived the study. S.L. performed the experimental work. S.L., M.S.T.-A. and Y.Q.  
418 performed the computational analysis. D.M.E. provided support to the experimental work. S.L. and C.K.  
419 interpreted the data and wrote the manuscript. All authors approved the final version of the manuscript.

420

#### 421 *Availability of data and materials*

422 The datasets supporting the conclusions of this article are available in the Gene Expression Omnibus  
423 (GEO) with the accession number GSE164394.

424

#### 425 **References**

- 426 1. Di Croce L, Helin K. Transcriptional regulation by Polycomb group proteins. *Nat Struct Mol Biol.* Nature  
427 Publishing Group; 2013;20:1147–55.
- 428 2. Schwartz YB, Pirrotta V. A new world of Polycombs: unexpected partnerships and emerging functions.  
429 *Nat Rev Genet.* Nature Publishing Group; 2013;14:853–64.
- 430 3. Mozgova I, Hennig L. The Polycomb Group Protein Regulatory Network. *Annu Rev Plant Biol.* Annual  
431 Reviews; 2015;66:269–96.
- 432 4. Schuettengruber B, Bourbon H-M, Di Croce L, Cavalli G. Genome Regulation by Polycomb and  
433 Trithorax: 70 Years and Counting. *Cell.* 2017;171:34–57.
- 434 5. Francis NJ, Kingston RE, Woodcock CL. Chromatin Compaction by a Polycomb Group Protein Complex.  
435 *Science.* American Association for the Advancement of Science; 2004;306:1574–7.
- 436 6. Bratzel F, López-Torrejón G, Koch M, Del Pozo JC, Calonje M. Keeping Cell Identity in Arabidopsis  
437 Requires PRC1 RING-Finger Homologs that Catalyze H2A Monoubiquitination. *Curr Biol.* 2010;20:1853–9.
- 438 7. Eskeland R, Leeb M, Grimes GR, Kress C, Boyle S, Sproul D, et al. Ring1B Compacts Chromatin  
439 Structure and Represses Gene Expression Independent of Histone Ubiquitination. *Mol Cell.*  
440 2010;38:452–64.
- 441 8. Xiao J, Wagner D. Polycomb repression in the regulation of growth and development in Arabidopsis.  
442 *Curr Opin Plant Biol.* 2015;23:15–24.
- 443 9. Cao R, Wang L, Wang H, Xia L, Erdjument-Bromage H, Tempst P, et al. Role of Histone H3 Lysine 27  
444 Methylation in Polycomb-Group Silencing. *Science.* American Association for the Advancement of  
445 Science; 2002;298:1039–43.
- 446 10. Czermin B, Melfi R, McCabe D, Seitz V, Imhof A, Pirrotta V. Drosophila Enhancer of Zeste/ESC  
447 Complexes Have a Histone H3 Methyltransferase Activity that Marks Chromosomal Polycomb Sites. *Cell.*  
448 2002;111:185–96.
- 449 11. Kuzmichev A, Nishioka K, Erdjument-Bromage H, Tempst P, Reinberg D. Histone methyltransferase  
450 activity associated with a human multiprotein complex containing the Enhancer of Zeste protein. *Genes*  
451 *Dev.* 2002;16:2893–905.
- 452 12. Müller J, Hart CM, Francis NJ, Vargas ML, Sengupta A, Wild B, et al. Histone Methyltransferase  
453 Activity of a Drosophila Polycomb Group Repressor Complex. *Cell.* 2002;111:197–208.
- 454 13. Gao Z, Zhang J, Bonasio R, Strino F, Sawai A, Parisi F, et al. PCGF Homologs, CBX Proteins, and RYBP  
455 Define Functionally Distinct PRC1 Family Complexes. *Mol Cell.* 2012;45:344–56.
- 456 14. Hauri S, Comoglio F, Seimiya M, Gerstung M, Glatter T, Hansen K, et al. A High-Density Map for  
457 Navigating the Human Polycomb Complexome. *Cell Rep.* 2016;17:583–95.
- 458 15. Wang H, Wang L, Erdjument-Bromage H, Vidal M, Tempst P, Jones RS, et al. Role of histone H2A  
459 ubiquitination in Polycomb silencing. *Nature.* Nature Publishing Group; 2004;431:873–8.

- 460 16. Shao Z, Raible F, Mollaaghababa R, Guyon JR, Wu C, Bender W, et al. Stabilization of Chromatin  
461 Structure by PRC1, a Polycomb Complex. *Cell*. 1999;98:37–46.
- 462 17. Francis NJ, Saurin AJ, Shao Z, Kingston RE. Reconstitution of a Functional Core Polycomb Repressive  
463 Complex. *Mol Cell*. 2001;8:545–56.
- 464 18. Lo SM, Ahuja NK, Francis NJ. Polycomb Group Protein Suppressor 2 of Zeste Is a Functional Homolog  
465 of Posterior Sex Combs. *Mol Cell Biol*. American Society for Microbiology Journals; 2009;29:515–25.
- 466 19. Xu L, Shen W-H. Polycomb Silencing of KNOX Genes Confines Shoot Stem Cell Niches in Arabidopsis.  
467 *Curr Biol*. 2008;18:1966–71.
- 468 20. Bratzel F, Yang C, Angelova A, López-Torrejón G, Koch M, Pozo JC del, et al. Regulation of the New  
469 Arabidopsis Imprinted Gene AtBMI1C Requires the Interplay of Different Epigenetic Mechanisms. *Mol*  
470 *Plant*. Elsevier; 2012;5:260–9.
- 471 21. Yang C, Bratzel F, Hohmann N, Koch M, Turck F, Calonje M. VAL- and AtBMI1-Mediated H2Aub  
472 Initiate the Switch from Embryonic to Postgerminative Growth in Arabidopsis. *Curr Biol*. 2013;23:1324–9.
- 473 22. Morey L, Aloia L, Cozzuto L, Benitah SA, Di Croce L. RYBP and Cbx7 Define Specific Biological  
474 Functions of Polycomb Complexes in Mouse Embryonic Stem Cells. *Cell Rep*. 2013;3:60–9.
- 475 23. Tavares L, Dimitrova E, Oxley D, Webster J, Poot R, Demmers J, et al. RYBP-PRC1 Complexes Mediate  
476 H2A Ubiquitylation at Polycomb Target Sites Independently of PRC2 and H3K27me3. *Cell*. 2012;148:664–  
477 78.
- 478 24. Blackledge NP, Farcas AM, Kondo T, King HW, McGouran JF, Hanssen LLP, et al. Variant PRC1  
479 Complex-Dependent H2A Ubiquitylation Drives PRC2 Recruitment and Polycomb Domain Formation. *Cell*.  
480 2014;157:1445–59.
- 481 25. Endoh M, Endo TA, Endoh T, Isono K, Sharif J, Ohara O, et al. Histone H2A Mono-Ubiquitination Is a  
482 Crucial Step to Mediate PRC1-Dependent Repression of Developmental Genes to Maintain ES Cell  
483 Identity. *PLOS Genet*. Public Library of Science; 2012;8:e1002774.
- 484 26. Cooper S, Dienstbier M, Hassan R, Schermelleh L, Sharif J, Blackledge NP, et al. Targeting Polycomb  
485 to Pericentric Heterochromatin in Embryonic Stem Cells Reveals a Role for H2AK119u1 in PRC2  
486 Recruitment. *Cell Rep*. 2014;7:1456–70.
- 487 27. Illingworth RS, Moffat M, Mann AR, Read D, Hunter CJ, Pradeepa MM, et al. The E3 ubiquitin ligase  
488 activity of RING1B is not essential for early mouse development. *Genes Dev*. 2015;29:1897–902.
- 489 28. Blackledge NP, Fursova NA, Kelley JR, Huseyin MK, Feldmann A, Klose RJ. PRC1 Catalytic Activity Is  
490 Central to Polycomb System Function. *Mol Cell*. 2020;77:857-874.e9.
- 491 29. Tamburri S, Lavarone E, Fernández-Pérez D, Conway E, Zanotti M, Manganaro D, et al. Histone  
492 H2AK119 Mono-Ubiquitination Is Essential for Polycomb-Mediated Transcriptional Repression. *Mol Cell*.  
493 2020;77:840-856.e5.

- 494 30. Pengelly AR, Kalb R, Finkl K, Müller J. Transcriptional repression by PRC1 in the absence of H2A  
495 monoubiquitylation. *Genes Dev.* Cold Spring Harbor Laboratory Press; 2015;29:1487.
- 496 31. Kahn TG, Dorafshan E, Schultheis D, Zare A, Stenberg P, Reim I, et al. Interdependence of PRC1 and  
497 PRC2 for recruitment to Polycomb Response Elements. *Nucleic Acids Res.* Oxford Academic;  
498 2016;44:10132–49.
- 499 32. Tsuboi M, Kishi Y, Yokozeki W, Koseki H, Hirabayashi Y, Gotoh Y. Ubiquitination-Independent  
500 Repression of PRC1 Targets during Neuronal Fate Restriction in the Developing Mouse Neocortex. *Dev*  
501 *Cell.* 2018;47:758-772.e5.
- 502 33. Zhou Y, Romero-Campero FJ, Gómez-Zambrano Á, Turck F, Calonje M. H2A monoubiquitination in  
503 *Arabidopsis thaliana* is generally independent of LHP1 and PRC2 activity. *Genome Biol.* 2017;18:69.
- 504 34. Kralemann LEM, Liu S, Trejo-Arellano MS, Muñoz-Viana R, Köhler C, Hennig L. Removal of H2Aub1 by  
505 ubiquitin-specific proteases 12 and 13 is required for stable Polycomb-mediated gene repression in  
506 *Arabidopsis*. *Genome Biol.* 2020;21.
- 507 35. Yin X, Romero-Campero FJ, de Los Reyes P, Yan P, Yang J, Tian G, et al. H2AK121ub in *Arabidopsis*  
508 associates with a less accessible chromatin state at transcriptional regulation hotspots. *Nat Commun.*  
509 Nature Publishing Group; 2021;12:315.
- 510 36. Derkacheva M, Liu S, Figueiredo DD, Gentry M, Mozgova I, Nanni P, et al. H2A deubiquitinases  
511 UBP12/13 are part of the *Arabidopsis* polycomb group protein system. *Nat Plants.* Nature Publishing  
512 Group; 2016;2:1–10.
- 513 37. Bowman JL, Kohchi T, Yamato KT, Jenkins J, Shu S, Ishizaki K, et al. Insights into Land Plant Evolution  
514 Garnered from the *Marchantia polymorpha* Genome. *Cell.* 2017;171:287-304.e15.
- 515 38. Kawashima T, Lorković ZJ, Nishihama R, Ishizaki K, Axelsson E, Yelagandula R, et al. Diversification of  
516 histone H2A variants during plant evolution. *Trends Plant Sci.* 2015;20:419–25.
- 517 39. Montgomery SA, Tanizawa Y, Galik B, Wang N, Ito T, Mochizuki T, et al. Chromatin Organization in  
518 Early Land Plants Reveals an Ancestral Association between H3K27me3, Transposons, and Constitutive  
519 Heterochromatin. *Curr Biol.* 2020;30:573-588.e7.
- 520 40. Sanchez-Pulido L, Devos D, Sung ZR, Calonje M. RAWUL: A new ubiquitin-like domain in PRC1 Ring  
521 finger proteins that unveils putative plant and worm PRC1 orthologs. *BMC Genomics.* 2008;9:308.
- 522 41. Junco SE, Wang R, Gaipa JC, Taylor AB, Schirf V, Gearhart MD, et al. Structure of the Polycomb Group  
523 Protein PCGF1 in Complex with BCOR Reveals Basis for Binding Selectivity of PCGF Homologs. *Structure.*  
524 2013;21:665–71.
- 525 42. Gray F, Cho HJ, Shukla S, He S, Harris A, Boytsov B, et al. BMI1 regulates PRC1 architecture and  
526 activity through homo- and hetero-oligomerization. *Nat Commun.* Nature Publishing Group;  
527 2016;7:13343.

- 528 43. Wong SJ, Gearhart MD, Taylor AB, Nanyes DR, Ha DJ, Robinson AK, et al. KDM2B Recruitment of the  
529 Polycomb Group Complex, PRC1.1, Requires Cooperation between PCGF1 and BCORL1. *Structure*.  
530 2016;24:1795–801.
- 531 44. Chittock EC, Latwiel S, Miller TCR, Müller CW. Molecular architecture of polycomb repressive  
532 complexes. *Biochem Soc Trans. Portland Press*; 2017;45:193–205.
- 533 45. Lee H-G, Kahn TG, Simcox A, Schwartz YB, Pirrotta V. Genome-wide activities of Polycomb complexes  
534 control pervasive transcription. *Genome Res*. 2015;25:1170–81.
- 535 46. Gómez-Zambrano Á, Merini W, Calonje M. The repressive role of Arabidopsis H2A.Z in transcriptional  
536 regulation depends on AtBMI1 activity. *Nat Commun. Nature Publishing Group*; 2019;10:2828.
- 537 47. Frangini A, Sjöberg M, Roman-Trufero M, Dharmalingam G, Haberle V, Bartke T, et al. The Aurora B  
538 Kinase and the Polycomb Protein Ring1B Combine to Regulate Active Promoters in Quiescent  
539 Lymphocytes. *Mol Cell*. 2013;51:647–61.
- 540 48. van den Boom V, Maat H, Geugien M, Rodríguez López A, Sotoca AM, Jaques J, et al. Non-canonical  
541 PRC1.1 Targets Active Genes Independent of H3K27me3 and Is Essential for Leukemogenesis. *Cell Rep*.  
542 2016;14:332–46.
- 543 49. Kloet SL, Makowski MM, Baymaz HI, van Voorthuijsen L, Karemaker ID, Santanach A, et al. The  
544 dynamic interactome and genomic targets of Polycomb complexes during stem-cell differentiation. *Nat*  
545 *Struct Mol Biol. Nature Publishing Group*; 2016;23:682–90.
- 546 50. Cohen I, Zhao D, Bar C, Valdes VJ, Dauber-Decker KL, Nguyen MB, et al. PRC1 Fine-tunes Gene  
547 Repression and Activation to Safeguard Skin Development and Stem Cell Specification. *Cell Stem Cell*.  
548 2018;22:726-739.e7.
- 549 51. Gao Z, Lee P, Stafford JM, von Schimmelmann M, Schaefer A, Reinberg D. An AUTS2–Polycomb  
550 complex activates gene expression in the CNS. *Nature. Nature Publishing Group*; 2014;516:349–54.
- 551 52. Linde A-M, Eklund DM, Kubota A, Pederson ERA, Holm K, Gyllenstrand N, et al. Early evolution of the  
552 land plant circadian clock. *New Phytol*. 2017;216:576–90.
- 553 53. Ishizaki K, Nishihama R, Ueda M, Inoue K, Ishida S, Nishimura Y, et al. Development of Gateway  
554 Binary Vector Series with Four Different Selection Markers for the Liverwort *Marchantia polymorpha*.  
555 *PLOS ONE. Public Library of Science*; 2015;10:e0138876.
- 556 54. Sugano SS, Nishihama R, Shirakawa M, Takagi J, Matsuda Y, Ishida S, et al. Efficient CRISPR/Cas9-  
557 based genome editing and its application to conditional genetic analysis in *Marchantia polymorpha*.  
558 *PLOS ONE. Public Library of Science*; 2018;13:e0205117.
- 559 55. Eklund DM, Kanei M, Flores-Sandoval E, Ishizaki K, Nishihama R, Kohchi T, et al. An Evolutionarily  
560 Conserved Abscisic Acid Signaling Pathway Regulates Dormancy in the Liverwort *Marchantia*  
561 *polymorpha*. *Curr Biol*. 2018;28:3691-3699.e3.
- 562 56. Dobin A, Davis CA, Schlesinger F, Drenkow J, Zaleski C, Jha S, et al. STAR: ultrafast universal RNA-seq  
563 aligner. *Bioinformatics. Oxford Academic*; 2013;29:15–21.

- 564 57. Love MI, Huber W, Anders S. Moderated estimation of fold change and dispersion for RNA-seq data  
565 with DESeq2. *Genome Biol.* 2014;15:550.
- 566 58. Villar CBR, Köhler C. Plant Chromatin Immunoprecipitation. In: Hennig L, Köhler C, editors. *Plant Dev*  
567 *Biol Methods Protoc.* Totowa, NJ: Humana Press; 2010. p. 401–11. Available from:  
568 [https://doi.org/10.1007/978-1-60761-765-5\\_27](https://doi.org/10.1007/978-1-60761-765-5_27)
- 569 59. Bolger AM, Lohse M, Usadel B. Trimmomatic: a flexible trimmer for Illumina sequence data.  
570 *Bioinformatics.* Oxford Academic; 2014;30:2114–20.
- 571 60. Langmead B, Salzberg SL. Fast gapped-read alignment with Bowtie 2. *Nat Methods.* Nature  
572 Publishing Group; 2012;9:357–9.
- 573 61. Heinz S, Benner C, Spann N, Bertolino E, Lin YC, Laslo P, et al. Simple Combinations of Lineage-  
574 Determining Transcription Factors Prime cis-Regulatory Elements Required for Macrophage and B Cell  
575 Identities. *Mol Cell.* 2010;38:576–89.
- 576 62. Thorvaldsdóttir H, Robinson JT, Mesirov JP. Integrative Genomics Viewer (IGV): high-performance  
577 genomics data visualization and exploration. *Brief Bioinform.* Oxford Academic; 2013;14:178–92.
- 578 63. Ramírez F, Dündar F, Diehl S, Grüning BA, Manke T. deepTools: a flexible platform for exploring  
579 deep-sequencing data. *Nucleic Acids Res.* Oxford Academic; 2014;42:W187–91.
- 580 64. Van Bel M, Diels T, Vancaester E, Kreft L, Botzki A, Van de Peer Y, et al. PLAZA 4.0: an integrative  
581 resource for functional, evolutionary and comparative plant genomics. *Nucleic Acids Res.* Oxford  
582 Academic; 2018;46:D1190–6.

583

584

585

586

587



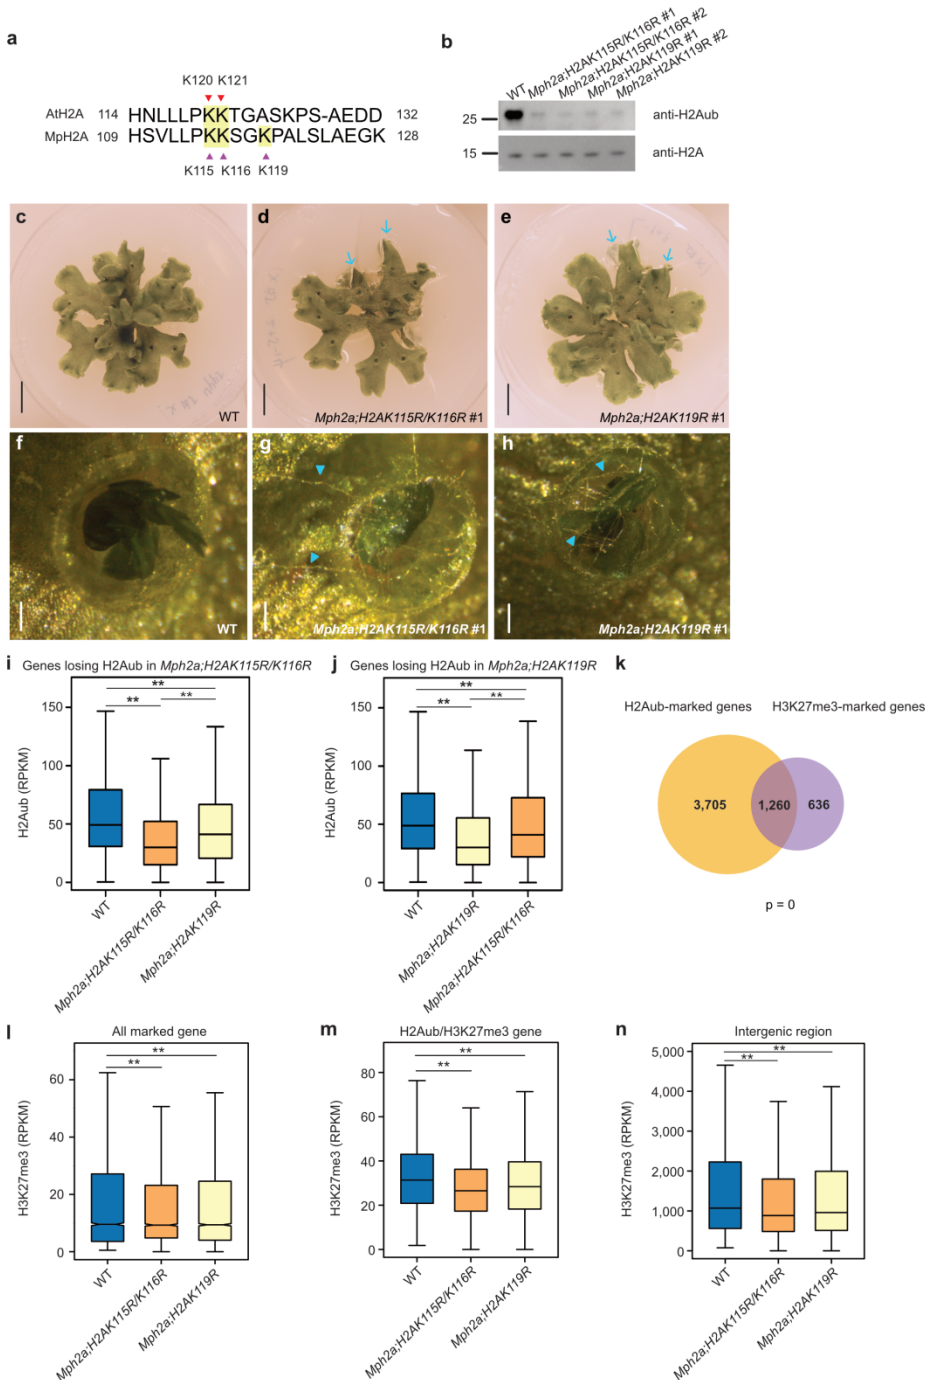

588

589 **Fig. 1 H2Aub directly contributes to the deposition of H3K27me3**

590 a. Lysine residues in *Arabidopsis* and *Marchantia* H2A. Lysine 120 (K120) and K121 of H2A in *Arabidopsis* and  
 591 potential ubiquitination sites (K115, K116 and K119) in H2A of *Marchantia* are highlighted. b. Western blot of bulk  
 592 H2Aub and H2A in wild type (WT), *Mph2a:H2AK115R/K116R* #1, *Mph2a:H2AK115R/K116R* #2,  
 593 *Mph2a:H2AK119R* #1 and *Mph2a:H2AK119R* #2 mutants. c-e. Phenotypes of 28 day-old WT,  
 594 *Mph2a:H2AK115R/K116R* #1 and *Mph2a:H2AK119R* #1 mutants. Blue arrows point to downward curled edges of  
 595 the thallus. Scale bars, 1 cm. f-h. Gemma cup phenotypes of WT, *Mph2a:H2AK115R/K116R* #1 and  
 596 *Mph2a:H2AK119R* #1 mutants. Blue arrowheads point at visible rhizoids produced by non-dormant gemmae in the  
 597 mutants. Scale bars, 0.05 cm. i. Boxplots showing H2Aub levels (RPKM, reads per kilobase per million mapped  
 598 reads) of genes losing H2Aub in *Mph2a:H2AK115R/K116R* in WT, *Mph2a:H2AK115R/K116R* and

599 *Mph2a;H2AK119R* mutants. j. Boxplots showing H2Aub levels of genes losing H2Aub in *Mph2a;H2AK119R* in  
600 WT, *Mph2a;H2AK119R* and *Mph2a;H2AK115R/K116R* mutants. k. Venn diagram showing overlap of H2Aub-  
601 marked genes and H3K27me3-marked genes in wild type (WT). Significance was tested using a Hypergeometric  
602 test. l, m. Boxplots showing H3K27me3 levels of all marked genes (l) and H2Aub/H3K27me3 genes (m) in WT,  
603 *Mph2a;H2AK115R/K116R* and *Mph2a;H2AK119R* mutants. H2Aub and H3K27me3 levels were calculated as the  
604 average RPKM from 1 kb upstream of the transcriptional start to the transcriptional start of genes. n. Boxplot  
605 showing H3K27me3 levels in intergenic regions marked by H2Aub and H3K27me3 in WT,  
606 *Mph2a;H2AK115R/K116R* and *Mph2a;H2AK119R* mutants. Boxes show medians and the interquartile range, and  
607 error bars show the full range excluding outliers. \*\*,  $p < 0.01$  (Wilcoxon test).

608  
609  
610  
611  
612  
613  
614  
615  
616  
617  
618  
619  
620

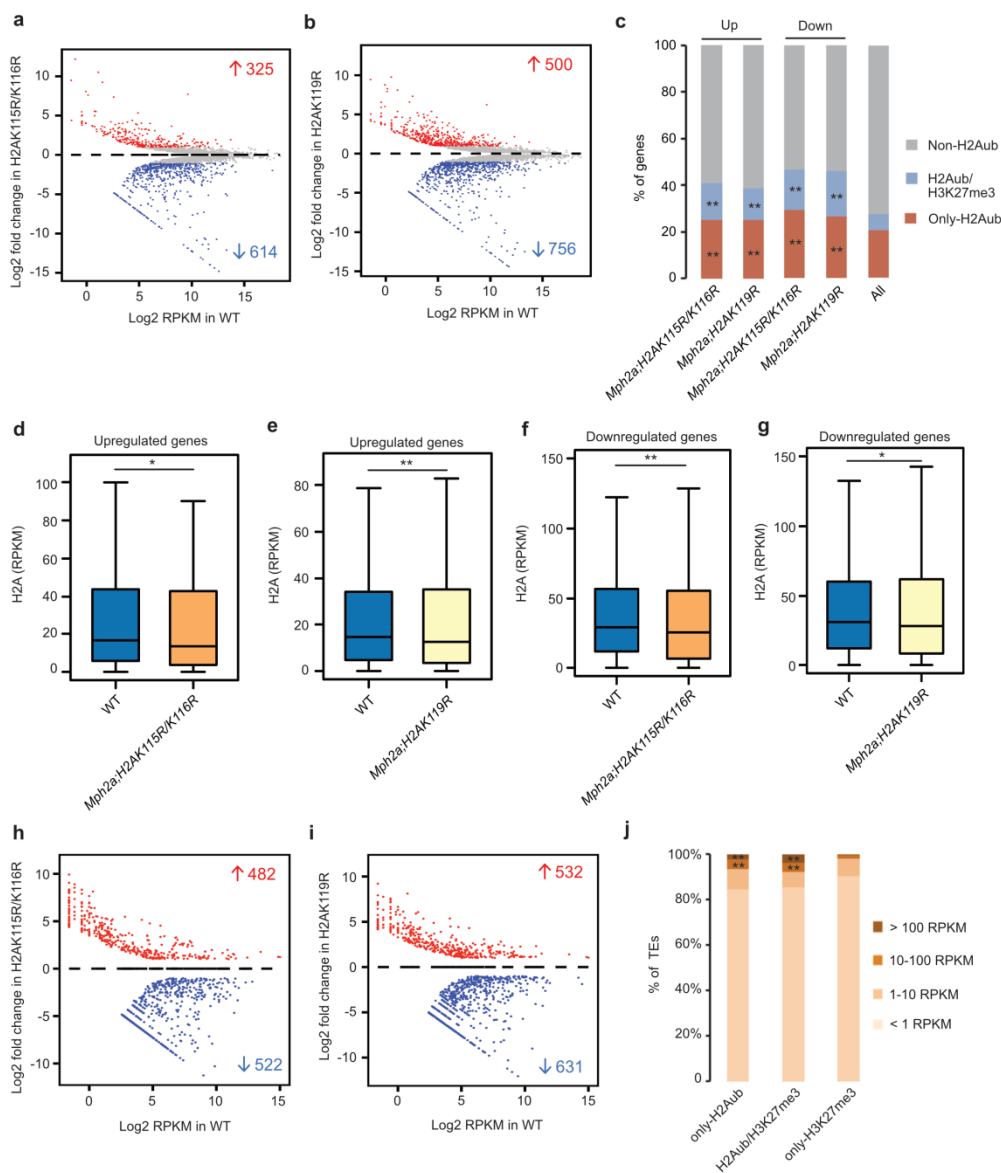

621

622 **Fig. 2 H2Aub is required for gene activation**

623 a, b. MA plots showing differential gene expression (Log<sub>2</sub> fold change) in *Mph2a*;H2AK115R/K116R (a) and  
 624 *Mph2a*;H2AK119R (b) mutants compared to wild type (WT). Significant changes are marked in red (log<sub>2</sub> fold  
 625 change ≥ 1 and adjusted p value ≤ 0.05) and blue (log<sub>2</sub> fold change ≤ -1 and adjusted p value ≤ 0.05). c. Presence of  
 626 only-H2Aub or H2Aub/H3K27me<sub>3</sub> marks on upregulated (Up) and downregulated (Down) genes in  
 627 *Mph2a*;H2AK115R/K116R and *Mph2a*;H2AK119R mutants. Presence of modifications is based on their distribution  
 628 in WT. \*\*, p < 0.01 (Hypergeometric test). d, e. Boxplots showing the H2Aub level on upregulated genes in  
 629 *Mph2a*;H2AK115R/K116R (d) and *Mph2a*;H2AK119R (e) mutants. f, g. Boxplots showing H2Aub level on  
 630 downregulated genes in *Mph2a*;H2AK115R/K116R (f) and *Mph2a*;H2AK119R (g) mutants. H2Aub levels were  
 631 calculated as the average RPKM from 1 kb upstream of the transcriptional start to the transcriptional start of genes.  
 632 oxes show medians and the interquartile range, and error bars show the full range excluding outliers. \*\*, p < 0.01  
 633 (Wilcoxon test). h, i. MA plots showing differential expression of transposable elements (TEs) (Log<sub>2</sub> fold change)  
 634 in *Mph2a*;H2AK115R/K116R (h) and *Mph2a*;H2AK119R (i) mutants. Significant gene expression changes are  
 635 marked in red (log<sub>2</sub> fold change ≥ 1 and adjusted p value ≤ 0.05) and blue (log<sub>2</sub> fold change ≤ -1 and adjusted p  
 636 value ≤ 0.05). j. Expression level distribution of transposable elements (TEs) marked by only-H2Aub,  
 637 H2Aub/H3K27me<sub>3</sub> and only-H3K27me<sub>3</sub> in WT. \*\*, p < 0.01 (Hypergeometric test).

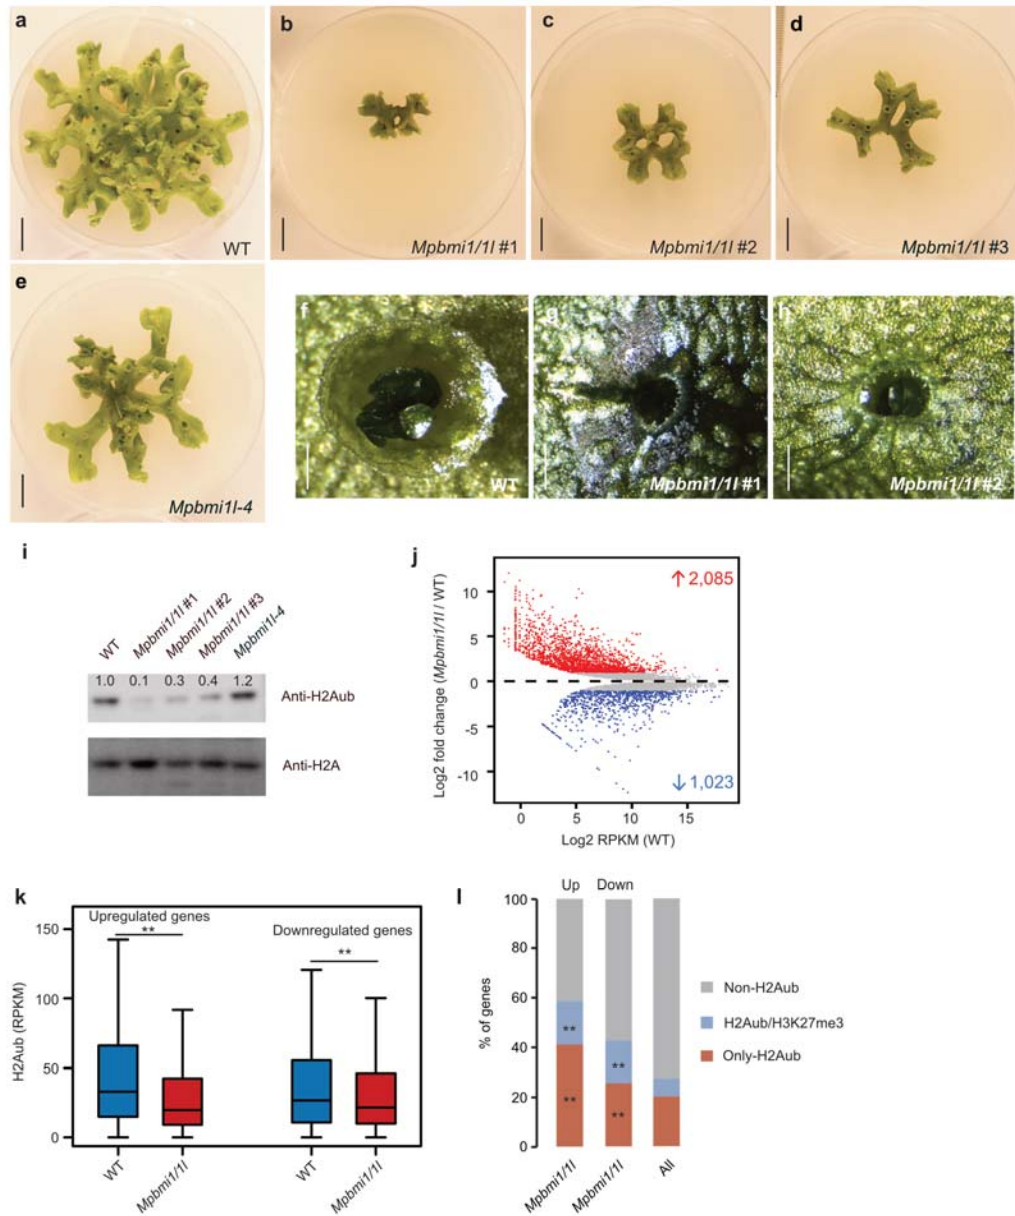

638

639 **Fig. 3 MpBMI1/1L affect morphological development of *Marchantia* and regulate gene silencing and**  
 640 **activation**

641 a-e. Morphological phenotypes of 35 day-old wild type (WT), *Mpbmi1/1l* #1, *Mpbmi1/1l* #2, *Mpbmi1/1l* #3 and  
 642 *Mpbmi1l-4* lines. Scale bars: 1 cm. f-h. Gemma cups of 35 day-old WT, *Mpbmi1/1l* #1 and *Mpbmi1/1l* #2 lines.  
 643 Scale bars: 0.1 cm. i. Western blot showing the bulk H2Aub levels in WT, *Mpbmi1/1l* #1, *Mpbmi1/1l* #2, *Mpbmi1/1l*  
 644 #3 and *Mpbmi1l-4* mutants. j. MA plot showing differential gene expression (Log<sub>2</sub> fold change) in *Mpbmi1/1l* #1  
 645 mutants compared to WT. Significant gene expression changes are marked in red (log<sub>2</sub> fold change ≥ 1 and adjusted  
 646 p value ≤ 0.05) and blue (log<sub>2</sub> fold change ≤ -1 and adjusted p value ≤ 0.05). i. Boxplot showing the H2Aub level  
 647 (RPKM, reads per kilobase per million mapped reads) of upregulated and downregulated genes in *Mpbmi1/1l* #1  
 648 mutants. H2Aub levels were calculated as the average RPKM from 1 kb upstream of the transcriptional start to the  
 649 transcriptional start of genes. Boxes show medians and the interquartile range, and error bars show the full range  
 650 excluding outliers. \*\*, p < 0.01 (Wilcoxon test). j. Percent of upregulated (Up) and downregulated (Down) genes  
 651 marked by only-H2Aub and H2Aub/H3K27me3 in *Mpbmi1/1l* #1 mutants. \*\*, p < 0.01 (Hypergeometric test).

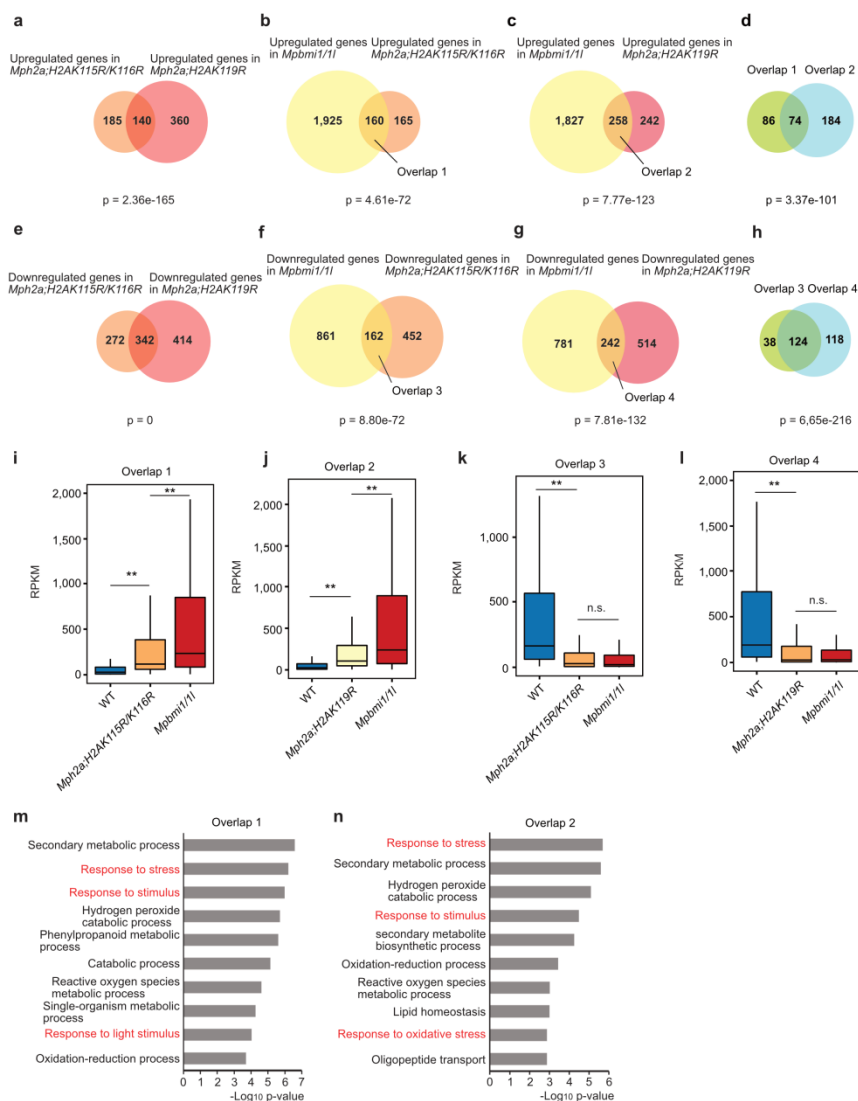

652

653 **Fig. 4 H2Aub contributes to PRC1-mediated transcriptional expression**

654 a. Venn diagram showing overlap of upregulated genes in *Mph2a;H2AK115R/K116R* and *Mph2a;H2AK119R*  
655 mutants. Significance was tested using a Hypergeometric test. b. Venn diagram showing overlap of upregulated  
656 genes in *Mpbmi1/1l* mutants and *Mph2a;H2AK115R/K116R* mutants. c. Venn diagram showing overlap of  
657 upregulated genes in *Mpbmi1/1l* mutants and *Mph2a;H2AK119R* mutants. d. Venn diagram showing overlap of  
658 commonly upregulated genes in overlap 1 (panel b) and overlap 2 (panel c). e. Venn diagram showing overlap of  
659 downregulated genes in *Mph2a;H2AK115R/K116R* and *Mph2a;H2AK119R* mutants. f. Venn diagram showing  
660 overlap of downregulated genes in *Mpbmi1/1l* mutants and *Mph2a;H2AK115R/K116R* mutants. g. Venn diagram  
661 showing overlap of downregulated genes in *Mpbmi1/1l* mutants and *Mph2a;H2AK119R* mutants. h. Venn diagram  
662 showing overlap of commonly downregulated genes in overlap 3 (panel f) and overlap 4 (panel g). i. Boxplot  
663 showing expression level (RPKM, reads per kilobase per million mapped reads) of genes in overlap 1 (panel b) in  
664 WT, *Mph2a;H2AK115R/K116R* and *Mpbmi1/1l*. j. Boxplot showing expression level (RPKM) of genes in overlap 2  
665 (panel c) in WT, *Mph2a;H2AK119R* and *Mpbmi1/1l*. k. Boxplot showing expression level (RPKM, reads per  
666 kilobase per million mapped reads) of genes in overlap 3 (panel f) in WT, *Mph2a;H2AK115R/K116R* and  
667 *Mpbmi1/1l*. l. Boxplot showing expression level (RPKM) of genes in overlap 4 (panel g) in WT, *Mph2a;H2AK119R*  
668 and *Mpbmi1/1l*. Boxes show medians and the interquartile range, and error bars show the full range excluding  
669 outliers. \*\*,  $p < 0.01$  (Wilcoxon test). m, n. Enriched GO terms of commonly upregulated genes in overlap 1 (panel  
670 b) and overlap 2 (panel c). Response pathways are marked in red.



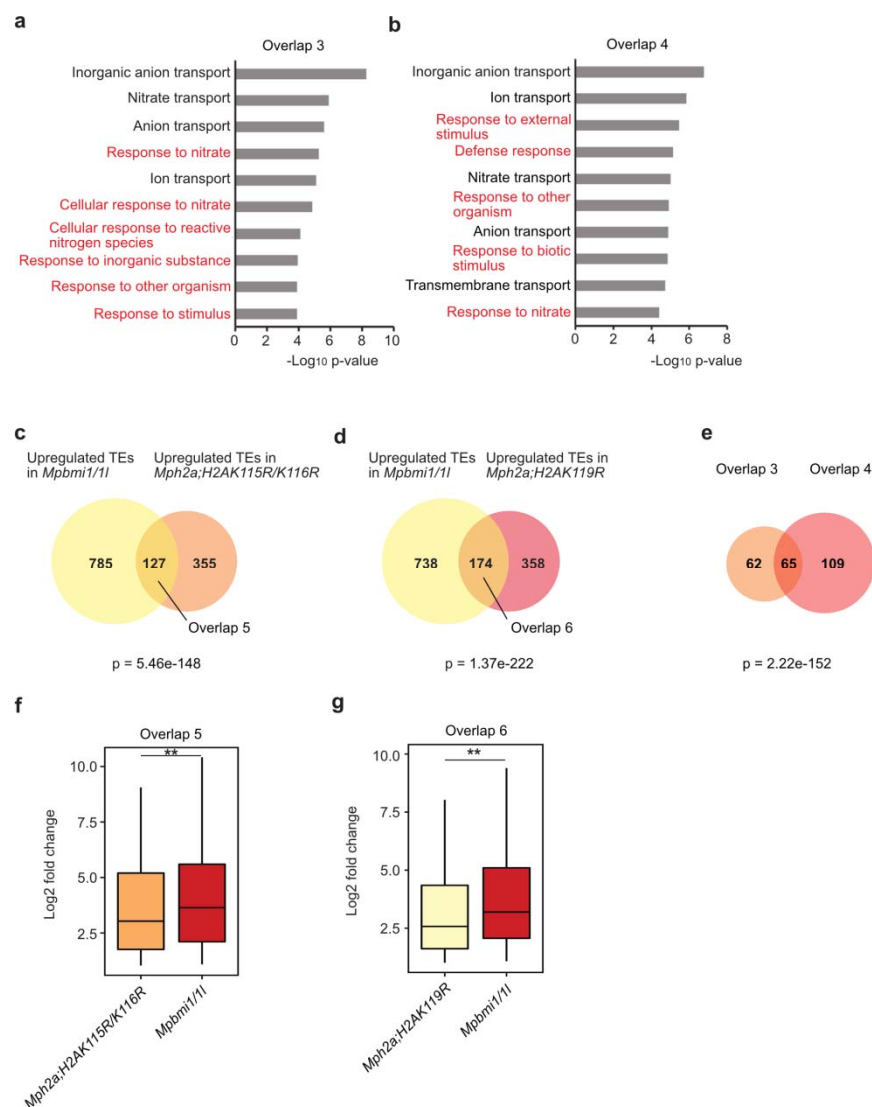

671

672 **Fig. 5 H2Aub is essential in PRC1-mediated transposable element silencing**

673 a, b. Enriched GO terms of commonly downregulated genes in overlap 3 (panel f in Fig. 4) and overlap 4 (panel g in  
674 Fig. 4). Response pathways are marked in red. c. Venn diagram showing overlap of upregulated transposable  
675 elements (TEs) in *Mpbmi1/1l* and *Mph2a;H2AK115R/K116R* mutants. Significance was tested using a  
676 Hypergeometric test. d. Venn diagram showing overlap of upregulated TEs in *Mpbmi1/1l* and *Mph2a;H2AK119R*  
677 mutants. Significance was tested using a Hypergeometric test. e. Venn diagram showing overlap of commonly  
678 upregulated TEs in overlap 5 (panel c) and overlap 6 (panel d). f. Boxplot showing differential expression level  
679 (Log<sub>2</sub> fold change) of TEs in overlap 5 (panel c) in *Mph2a;H2AK115R/K116R* and *Mpbmi1/1l* mutants compared to  
680 WT. n. Boxplot showing differential expression level (Log<sub>2</sub> fold change) of TEs in overlap 6 (panel d) in  
681 *Mph2a;H2AK119R* and *Mpbmi1/1l* mutants compared to WT. Boxes show medians and the interquartile range, and  
682 error bars show the full range excluding outliers. \*\*, p < 0.01 (Wilcoxon test).

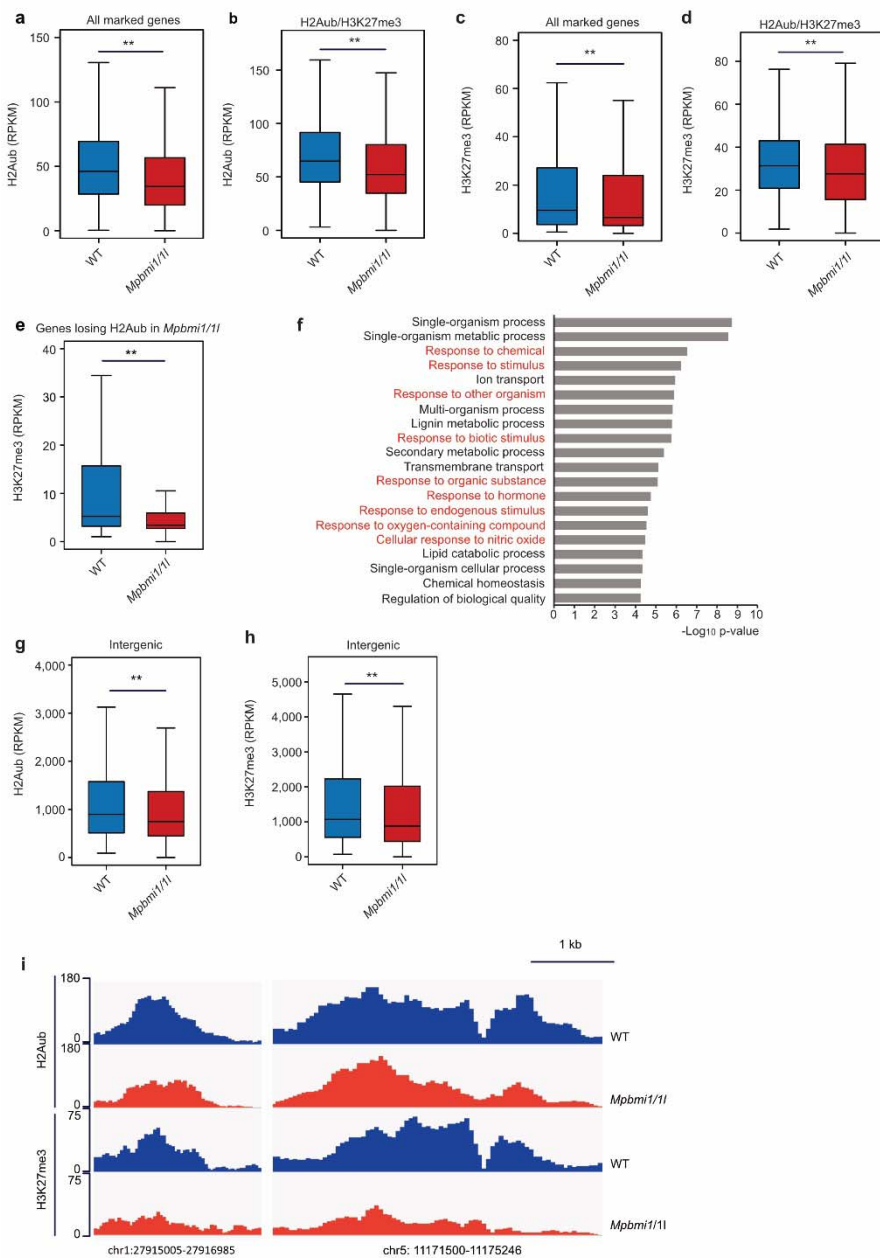

683  
684

685 **Fig. 6 H3K27me3 is decreased on Polycomb target genes in genic and intergenic region by depletion of**  
686 **MpBMI1/1L**

687 a, b. Boxplots showing H2Aub level (RPKM, reads per kilobase per million mapped reads) on all marked genes (a)  
688 and H2Aub/H3K27me3 genes (b) in WT and *Mpbmi1/1l* mutants. c, d. Boxplots showing H3K27me3 level on all  
689 marked genes (c) and H2Aub/H3K27me3 genes (d) in WT and *Mpbmi1/1l* mutants. H2Aub and H3K27me3 levels  
690 were calculated as the average RPKM from 1 kb upstream of the transcriptional start to the transcriptional start of  
691 genes. e. Boxplot showing H3K27me3 level of genes with reduced H2Aub level in *Mpbmi1/1l* mutants. f. GO terms  
692 of genes with reduced H2Aub level in *Mpbmi1/1l* mutants. Response pathways are marked in red. g, h. Boxplots  
693 showing H2Aub (g) and H3K27me3 level (h) on H2Aub/H3K27me3-occupying intergenic regions in wild type (WT)  
694 and *Mpbmi1/1l* mutants. Boxes show medians and the interquartile range, and error bars show the full range  
695 excluding outliers. \*\*,  $p < 0.01$  (Wilcoxon test). i. Genome browser views of two selected intergenic loci showing  
696 decreased H2Aub and H3K27me3 marks in *Mpbmi1/1l* mutants compared to WT.
